# Supplementary material
Source: publisher site journal article supplement (https://www.oncotarget.com/article/28630)
Supplement: Supplementary file 1 [file 28630]

## Addendum

**Addendum: Exploring the role of GHRH antagonist MIA-602 in overcoming Doxorubicin-resistance in acute myeloid leukemia****Simonetta I. Gaumont<sup>1</sup>, Rama Abdin<sup>2</sup>, Joel Costoya<sup>1</sup>, Andrew V. Schally<sup>3</sup> and Joaquin J. Jimenez<sup>1</sup>**<sup>1</sup>Dr. Philip Frost Department of Dermatology and Cutaneous Surgery, Miller School of Medicine, University of Miami, Miami, FL 33136, USA<sup>2</sup>Charles E. Schmidt College of Medicine, Florida Atlantic University, Boca Raton, FL 33431, USA<sup>3</sup>Veterans Affairs Medical Center, Miami, FL 33125, USA**Published:****Copyright:** © 2024 Gaumont et al. This is an open access article distributed under the terms of the [Creative Commons Attribution License](#) (CC BY 4.0), which permits unrestricted use, distribution, and reproduction in any medium, provided the original author and source are credited.**This article has an addendum:** This article received a publication fee waiver.Original article: Oncotarget. 2024; 15:248–254. <https://doi.org/10.18632/oncotarget.28579>
